# Supplementary material for: Encapsulation of doxorubicin within multifunctional gadolinium-loaded dendrimer nanocomplexes for targeted theranostics of cancer cells
Source: Royal Society of Chemistry journal article supplement (doi:10.1039/c5ra01215e), 2015-01-01
Supplement: c5ra01215e1.pdf [file c5ra01215e1.pdf]

## Electronic Supplementary Information

### **Encapsulation of doxorubicin within multifunctional gadolinium-loaded dendrimer nanocomplexes for targeted theranostics of cancer cells†**

Jingyi Zhu,<sup>1</sup> Zhijuan Xiong,<sup>2</sup> Mingwu Shen,<sup>2</sup> Xiangyang Shi<sup>\*1, 2</sup>

<sup>1</sup> State Key Laboratory for Modification of Chemical Fibers and Polymer Materials, College of Materials Science and Engineering, Donghua University, Shanghai 201620, People's Republic of China

<sup>2</sup> College of Chemistry, Chemical Engineering and Biotechnology, Donghua University, Shanghai 201620, People's Republic of China

---

\* Corresponding author. Tel: +86 21 67792656; fax: +86 21 67792306 804.

E-mail address: xshi@dhu.edu.cn

**Table S1.** Zeta potential values of the G5.NHAc-DOTA(Gd)-PEG-FA dendrimers and G5.NHAc-DOTA(Gd)-PEG-FA/DOX complexes under different pH conditions.

| Materials                   | Zeta potential (mV) |            |             |
|-----------------------------|---------------------|------------|-------------|
|                             | pH = 5.0            | pH = 7.4   | pH = 10.0   |
| G5.NHAc-DOTA(Gd)-PEG-FA     | 14.7 ± 2.2          | 11.3 ± 2.3 | -9.7 ± 1.0  |
| G5.NHAc-DOTA(Gd)-PEG-FA/DOX | 15.4 ± 1.9          | 8.8 ± 4.0  | -10.4 ± 4.4 |

**Table S2.** Quantification of DOX loaded within the G5.NHAc-DOTA(Gd)-PEG-FA dendrimers.

| Materials                   | Practical number of DOX loaded within each G5 dendrimer | Drug encapsulation efficiency (EE%) | Drug loading percentage (DL%) |
|-----------------------------|---------------------------------------------------------|-------------------------------------|-------------------------------|
| G5.NHAc-DOTA(Gd)-PEG-FA/DOX | 8.5                                                     | 78.9%                               | 5.7%                          |

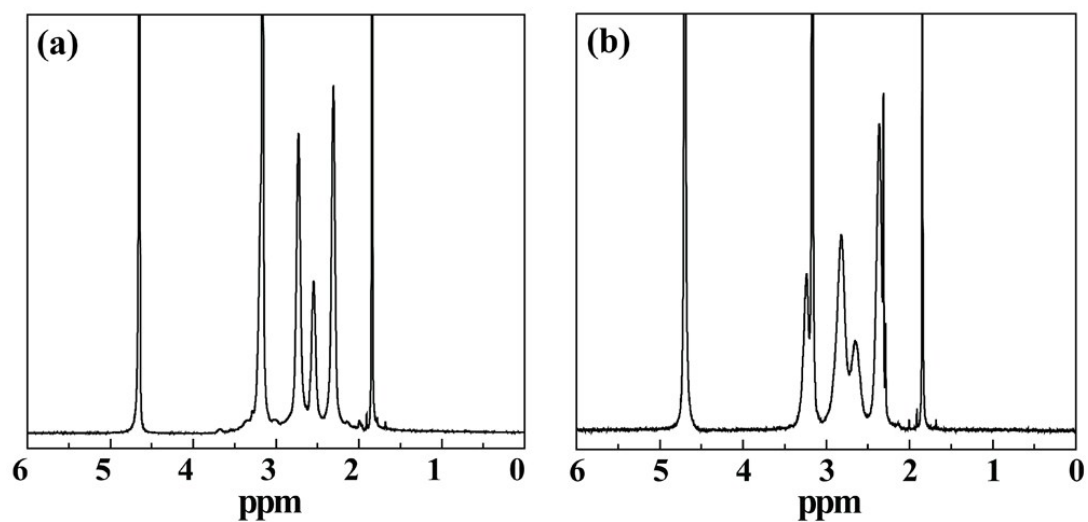

**Figure S1.**  $^1\text{H}$  NMR spectrum of G5.NHAc (a) and G5.NHAc-DOTA dendrimers (b) dissolved in  $\text{D}_2\text{O}$ .

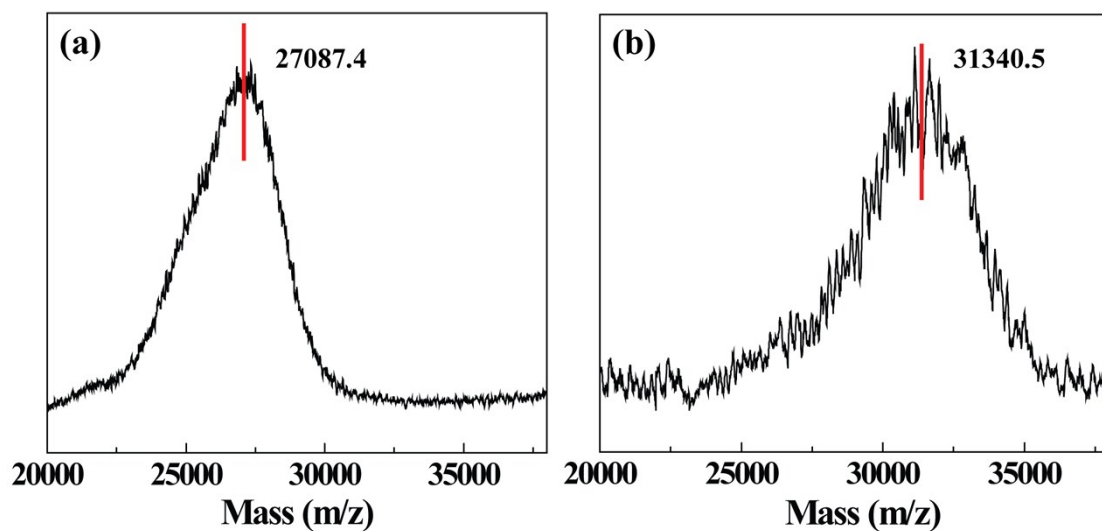

**Figure S2.** MALDI-TOF mass spectrum of G5.NH<sub>2</sub> (a) and G5.NH<sub>2</sub>-DOTA (b) dendrimers.

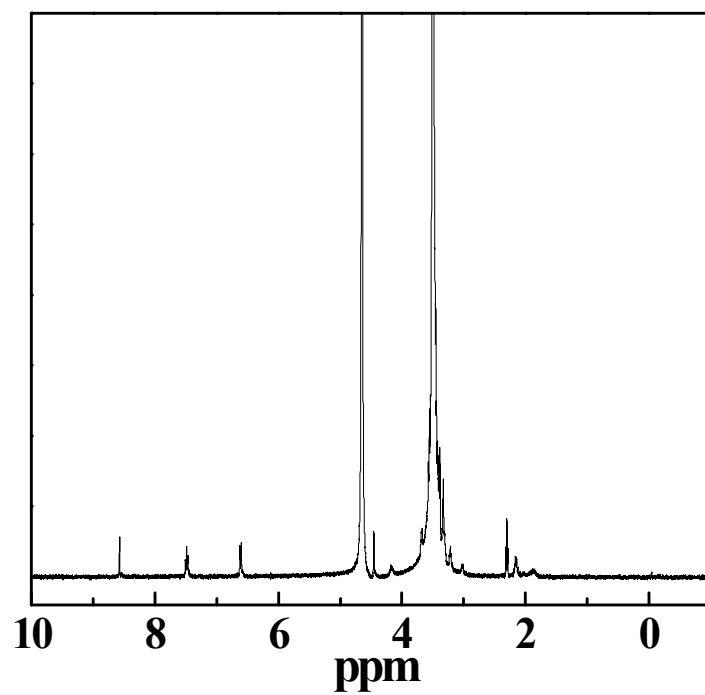

**Figure S3.**  $^1\text{H}$  NMR spectrum of FA-PEG-COOH dissolved in  $\text{D}_2\text{O}$ .

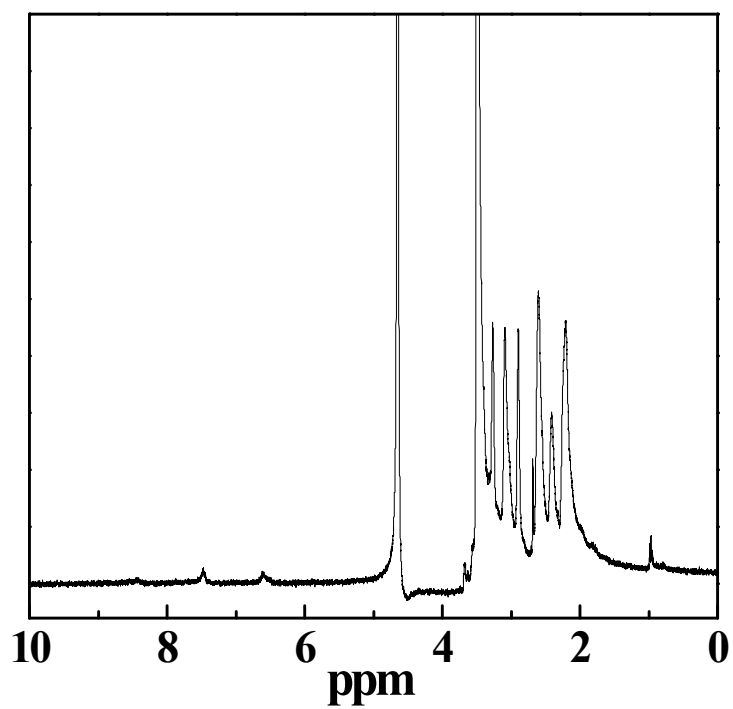

**Figure S4.**  $^1\text{H}$  NMR spectrum of G5.NH<sub>2</sub>-DOTA-PEG-FA dissolved in  $\text{D}_2\text{O}$ .

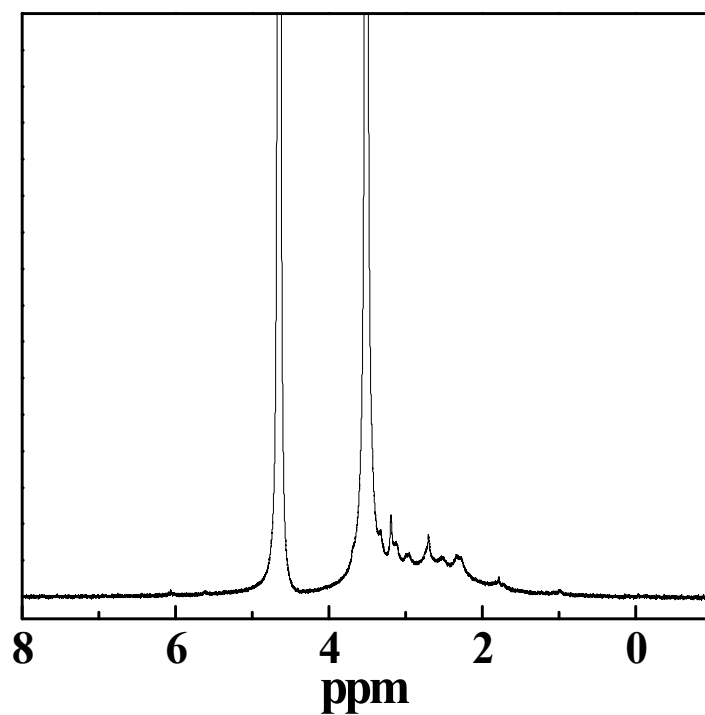

**Figure S5.** <sup>1</sup>H NMR spectrum of G5.NH<sub>2</sub>-DOTA-*m*PEG dissolved in D<sub>2</sub>O.

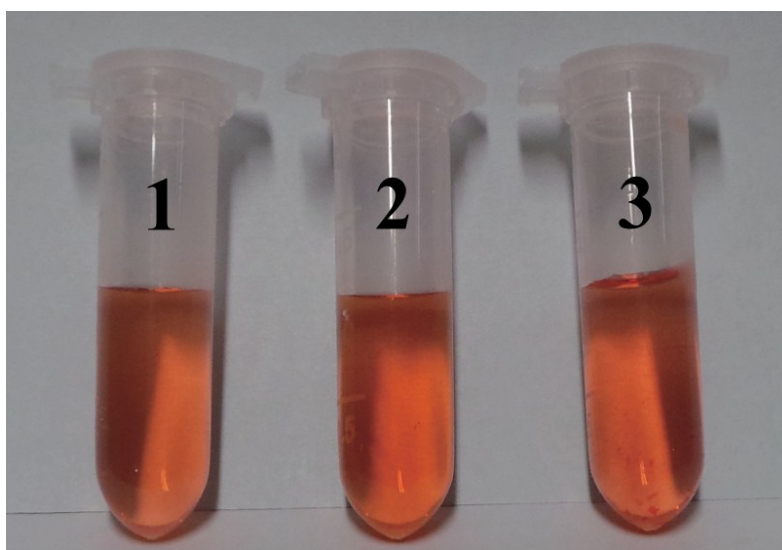

**Figure S6.** Photograph of the aqueous solutions of G5.NHAc-DOTA(Gd)-PEG-FA/DOX complexes (a) under different pH conditions (pH = 5.0 (1), 7.4 (2), and 10.0 (3)).

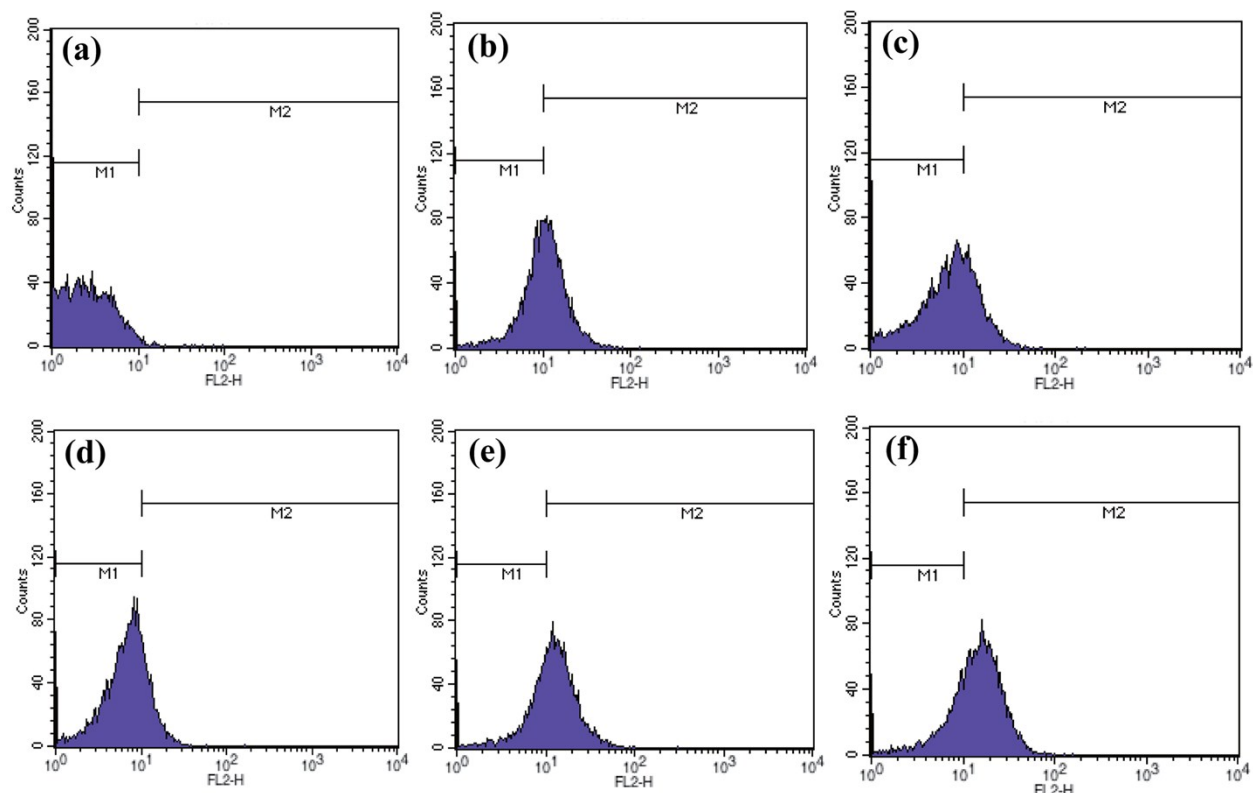

**Figure S7.** Flow cytometric analysis of KB-HFAR cells treated with (a) PBS and (b) free DOX; KB-LFAR cells treated with the G5.NHAc-DOTA(Gd)-*m*PEG/DOX (c) and G5.NHAc-DOTA(Gd)-PEG-FA/DOX (e) complexes; KB-HFAR cells treated with G5.NHAc-DOTA(Gd)-*m*PEG/DOX (d) and G5.NHAc-DOTA(Gd)-PEG-FA/DOX (f) complexes, respectively.

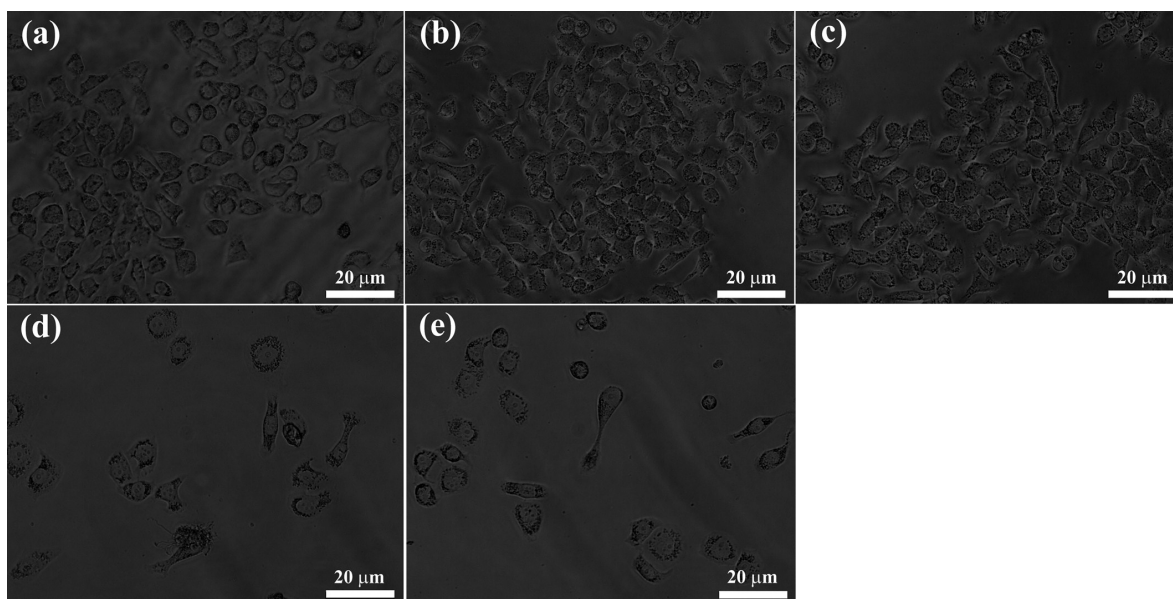

**Figure S8.** Phase contrast microscopic images of KB-HFAR cells without treatment (a) and treated with PBS (b), G5.NHAc-DOTA(Gd)-PEG-FA dendrimers without DOX but with the same concentration as those used to encapsulate 600 nM DOX (c), free DOX (600 nM) (d), and G5.NHAc-DOTA(Gd)-PEG-FA/DOX complexes ([DOX] = 600 nM) (e), respectively. The cells were treated for 24 h before observation.
